# Supplementary material
Source: Research Square preprint supplement (doi:10.21203/rs.3.rs-9453201/v1)
Supplement: Supplementary file 1 [file 7285a505bcdfb6bd89209416.docx]

Table 1. Sample demographics at Follow-up 5 (FU5)

|  | Full Sample (FU5) | Machine Learning Predictions | | |
| --- | --- | --- | --- | --- |
|  | n | Mean (SD) | n | Mean (SD) |
| Age (years) | 761 | 72.43 (6.18) | 729 | 72.33 (6.09) |
| Sex | 761 | 53% female | 729 | 53% female |
| Education Years | 761 | 14.59 (2.64) | 729 | 14.61 (2.62) |
| MoCA (corrected for education) | 759 | 24.47 (3.15) | 727 | 24.51 (3.11) |

Table 2. Correlation matrix

| Variable | 1 | 2 | 3 | 4 | 5 | 6 | 7 | 8 | 9 | 10 | 11 | 12 | 13 | 14 |
| --- | --- | --- | --- | --- | --- | --- | --- | --- | --- | --- | --- | --- | --- | --- |
| 1. Age | - |  |  |  |  |  |  |  |  |  |  |  |  |  |
| 2. Sex | -0.16*** | - |  |  |  |  |  |  |  |  |  |  |  |  |
| 3. Years of Education | 0 | -0.28*** | - |  |  |  |  |  |  |  |  |  |  |  |
| 4. MoCA total score corrected for education | -0.40*** | 0.12** | 0.21*** | - |  |  |  |  |  |  |  |  |  |  |
| 5. Attention Domain | -0.10** | 0.12** | 0.07 | 0.23*** | - |  |  |  |  |  |  |  |  |  |
| 6. Memory Domain | -0.42*** | 0.26*** | 0.13*** | 0.55*** | 0.21*** | - |  |  |  |  |  |  |  |  |
| 7. Intrusions Domain | -0.11** | 0.02 | 0.09** | 0.23*** | 0.01 | 0.29*** | - |  |  |  |  |  |  |  |
| 8. Visuospatial Domain | -0.23*** | -0.06 | 0.22*** | 0.28*** | 0.09* | 0.18*** | 0.08* | - |  |  |  |  |  |  |
| 9. Executive/language Domain | -0.46*** | 0.11** | 0.21*** | 0.62*** | 0.28*** | 0.52*** | 0.15*** | 0.28*** | - |  |  |  |  |  |
| 10. Theory-based Memory Domain | -0.12** | 0.07* | -0.07 | 0.37*** | 0.15*** | 0.70*** | 0.24*** | 0.34*** | 0.29*** | - |  |  |  |  |
| 11. Theory-based Language Domain | -0.06 | 0.07 | -0.11** | 0.40*** | 0.18*** | 0.31*** | 0.06 | 0.08* | 0.71*** | 0.28*** | - |  |  |  |
| 12. Theory-based Executive Domain | -0.25*** | 0.01 | 0.01 | 0.40*** | 0.15*** | 0.31*** | 0.11** | 0.24*** | 0.65*** | 0.26*** | 0.37*** | - |  |  |
| 13. Theory-based Visuospatial Domain | -0.12*** | 0.12** | -0.04 | 0.18*** | 0.09* | 0.13*** | 0.06 | 0.59*** | 0.19*** | 0.20*** | 0.08* | 0.20*** | - |  |
| 14. z-score based CERAD-plus NAB total score (TS2) | -0.22*** | 0.04 | -0.05 | 0.55*** | 0.20*** | 0.67*** | 0.23*** | 0.36*** | 0.74*** | 0.70*** | 0.70*** | 0.66*** | 0.37*** | - |

Table 3. Comparison of domains scores between MCI and healthy participants

| Domain | Overall | MCI | Healthy | P-value |
| --- | --- | --- | --- | --- |
| M [95%-CI] | M [95%-CI] | M [95%-CI] |
| Attention | 0.65 [0.65, 0.66] | 0.63 [0.62, 0.65] | 0.66 [0.66, 0.66] | < .001 |
| Memory | 0.77 [0.76, 0.78] | 0.69 [0.67, 0.70] | 0.80 [0.80, 0.81] | < .001 |
| Intrusions | 0.91 [0.90, 0.92] | 0.87 [0.85, 0.90] | 0.92 [0.91, 0.93] | < .001 |
| Visuospatial | 0.85 [0.84, 0.86] | 0.8 [0.78, 0.82] | 0.87 [0.86, 0.88] | < .001 |
| Executive/Language | 0.72 [0.71, 0.72] | 0.63 [0.62, 0.65] | 0.75 [0.74, 0.75] | < .001 |

Note. Due to rounding and formatting some confidence intervals show identical upper and lower bounds in this table not reflecting differences in the third and following digits.

Table 4: Performance metrics of the baseline ANN

| Domain | R2  M (SD) | MAPE  M (SD) | RMSE  M (SD) |
| --- | --- | --- | --- |
| Attention | 0.01 (0.01) | 0.05 (0.00) | 0.05 (0.00) |
| Executive/Language | 0.23 (0.01) | 0.10 (0.00) | 0.08 (0.00) |
| Intrusions | -0.01 (0.01) | 0.10 (0.00) | 0.11 (0.00) |
| Memory | 0.21 (0.01) | 0.12 (0.00) | 0.10 (0.00) |
| Visuospatial | 0.05 (0.01) | 0.14 (0.00) | 0.13 (0.00) |

Note. Negative R2 values represent mathematical edge cases where the respective model performs worse than a model predicting the sample average.

Table 5. Performance metrics of the ANN using dCDT drawing data and control variables

| Domain | R2  M (SD) | MAPE  M (SD) | RMSE  M (SD) |
| --- | --- | --- | --- |
| Attention | -0.02 (0.01) | 0.05 (0.00) | 0.05 (0.00) |
| Executive/Language | 0.34 (0.02) | 0.09 (0.00) | 0.08 (0.00) |
| Intrusions | -0.01 (0.00) | 0.10 (0.00) | 0.11 (0.00) |
| Memory | 0.17 (0.03) | 0.12 (0.00) | 0.11 (0.00) |
| Visuospatial | -0.01 (0.02) | 0.14 (0.00) | 0.13 (0.00) |

Note. Negative R2 values represent mathematical edge cases where the respective model performs worse than a model predicting the sample average.

Table 6. Performance metrics of the ANN using dFCT drawing data and control variables

| Domain | R2  M (SD) | MAPE  M (SD) | RMSE  M (SD) |
| --- | --- | --- | --- |
| Attention | -0.02 (0.01) | 0.05 (0.00) | 0.05 (0.00) |
| Executive/Language | 0.24 (0.01) | 0.10 (0.00) | 0.08 (0.00) |
| Intrusions | -0.01 (0.00) | 0.10 (0.00) | 0.11 (0.00) |
| Memory | 0.16 (0.01) | 0.12 (0.00) | 0.11 (0.00) |
| Visuospatial | -0.01 (0.01) | 0.14 (0.00) | 0.13 (0.00) |

*Note.* Negative R2 values represent mathematical edge cases where the respective model performs worse than a model predicting the sample average.

Table 7. Performance metrics of the ANN using dTMT drawing data and control variables.

| Domain | R2  M (SD) | MAPE  M (SD) | RMSE  M (SD) |
| --- | --- | --- | --- |
| Attention | -0.03 (0.02) | 0.05 (0.00) | 0.05 (0.00) |
| Executive/Language | 0.37 (0.02) | 0.09 (0.00) | 0.07 (0.00) |
| Intrusions | -0.01 (0.02) | 0.10 (0.00) | 0.11 (0.00) |
| Memory | 0.21 (0.01) | 0.12 (0.00) | 0.10 (0.00) |
| Visuospatial | -0.01 (0.01) | 0.14 (0.00) | 0.13 (0.00) |

*Note.* Negative R2 values represent mathematical edge cases where the respective model performs worse than a model predicting the sample average.

Table 8. Shapley values for the five most important features

| dCDT |  | dFCT |  | dTMT | |
| --- | --- | --- | --- | --- | --- |
| Feature | |s| | Feature | |s| | Feature | |s| | |
| Age | 0.024 | Age | 0.027 | Age | 0.024 | |
| Education years | 0.010 | Sex | 0.013 | Total surface stroke duration | 0.020 | |
| Sex | 0.009 | Surface stroke ressure SD | 0.009 | Education years | 0.011 | |
| Mean Straight-Line Distance of Hover Movements | 0.008 | Education years | 0.008 | Sex | 0.011 | |
| Adjusted Duration | 0.007 | Mean hover movement velocity | 0.006 | Total surface stroke distance | 0.009 | |
