# Supplementary material
Source: Research Square preprint supplement (doi:10.21203/rs.3.rs-9453201/v1)
Supplement: Supplementary file 2 [file 9ad98300ba49194f79ea6d60.docx]

# Appendix

Table 9 Descriptive statistics for digital drawing features by task

| Feature | CDT | FCT | TMT |
| --- | --- | --- | --- |
| Mean (SD) | Mean (SD) | Mean (SD) |
| Number of Surface Strokes | 28.92 (9.65) | 15.93 (7.51) | 4.36 (3.62) |
| Total Duration of Surface Strokes (s) | 15.55 (6.62) | 14.28 (8.22) | 9.12 (4.07) |
| Mean Velocity of Surface Strokes (px/s) | 310.32 (109.81) | 380.65 (181.94) | 333.74 (131.16) |
| SD Velocity of Surface Strokes (px/s) | 145.79 (70.53) | 150.31 (86.10) | 87.80 (84.08) |
| Mean Distance of Surface Strokes (px) | 174.65 (52.95) | 313.24 (120.92) | 1302.95 (1041.12) |
| SD Distance of Surface Strokes (px) | 322.45 (91.31) | 238.79 (151.82) | 335.93 (511.50) |
| Total Distance of Surface Strokes (px) | 4813.34 (1507.08) | 4519.73 (1609.21) | 2697.33 (650.13) |
| Mean Straightline Distance of Surface Strokes (px) | 51.60 (17.24) | 243.89 (68.80) | 346.87 (155.64) |
| SD Straightline Distance of Surface Strokes (px) | 47.35 (21.23) | 163.47 (44.07) | 109.90 (106.19) |
| Mean Pressure of Surface Strokes | 0.41 (0.12) | 0.40 (0.14) | 0.60 (0.18) |
| SD Pressure of Surface Strokes | 0.11 (0.04) | 0.13 (0.06) | 0.10 (0.13) |
| Total X Distance Covered by Surface Strokes (px) | 586.16 (141.52) | 644.94 (125.70) | 750.47 (31.22) |
| Total Y Distance Covered by Surface Strokes (px) | 543.23 (124.78) | 404.47 (87.07) | 680.64 (83.52) |
| Number of Hover Movements | 28.24 (9.82) | 15.44 (8.19) | 3.40 (3.67) |
| Total Duration of Hover Movements (s) | 31.02 (19.27) | 19.73 (18.01) | 4.75 (7.29) |
| Mean Velocity of Hover Movements (px/s) | 316.97 (97.52) | 425.27 (157.64) | 155.18 (146.65) |
| SD Velocity of Hover Movements (px/s) | 161.76 (64.20) | 237.01 (95.89) | 66.49 (90.82) |
| Mean Distance of Hover Movements (px) | 266.13 (96.12) | 401.92 (137.71) | 175.05 (238.40) |
| SD Distance of Hover Movements (px) | 260.19 (145.27) | 302.35 (171.36) | 121.69 (241.52) |
| Total Distance of Hover Movements (px) | 7407.72 (3676.52) | 6166.66 (4131.96) | 873.10 (1355.01) |
| Mean Straight-Line Distance of Hover Movements (px) | 132.57 (53.48) | 244.42 (91.11) | 43.49 (73.44) |
| SD Straight-Line Distance of Hover Movements (px) | 113.12 (44.54) | 204.44 (49.50) | 29.89 (61.54) |
| Total X Distance Covered by Hover Movements (px) | 565.43 (150.36) | 671.55 (134.74) | 336.70 (328.72) |
| Total Y Distance Covered by Hover Movements (px) | 537.86 (128.40) | 433.93 (97.74) | 285.70 (285.31) |
| Mean Surface Stroke Duration / Mean Hover Movement Duration | 0.57 (0.23) | 1.02 (0.77) | 6.00 (22.13) |
| Use of Erase Function (Yes/No) | 0.21 (0.40) | 0.27 (0.45) | 0.03 (0.18) |
| Surface Stroke Mean Pressure / Mean Velocity * 1e3 A | 1.51 (0.72) | 1.29 (0.75) | 2.05 (0.94) |
| Total Duration (s) | 46.58 (23.69) | 34.00 (24.24) | 11.24 (11.10) |
| Proportion of Surface Stroke to Hover Movement Duration | 0.57 (0.23) | 1.02 (0.77) | 6.00 (22.13) |
| Total Distance (px) | 12221.06 (4753.39) | 10686.39 (5435.64) | 2751.92 (2276.46) |
| Area Covered by Surface Strokes (px2) | 334395.61 (155241.97) | 268746.37 (105745.76) | 512098.55 (74255.12) |
| Area Covered by Hover Movements (px2) | 320641.95 (160064.82) | 300371.25 (119299.38) | 176495.40 (208059.73) |
| Adjusted Duration (s/px) * 1e3A | 3.87 (1.29) | 3.11 (1.28) | 2.84 (2.23) |

Note. A: Values have been multiplied by 1,000 for summary statistics as means and standard deviation were too small for the level of accuracy displayed in this table.

Table 10. Distance correlations of CERAD-plus NAB measures used for data-driven domain discovery

|  | N | M (SD) | 1 | 2 | 3 | 4 | 5 | 6 | 7 | 8 | 9 | 10 | 11 | 12 | 13 | 14 | 15 | 16 | 17 | 18 | 19 | 20 | 21 | 22 | 23 | 24 | 25 | 26 | 27 | 28 | 29 |
| --- | --- | --- | --- | --- | --- | --- | --- | --- | --- | --- | --- | --- | --- | --- | --- | --- | --- | --- | --- | --- | --- | --- | --- | --- | --- | --- | --- | --- | --- | --- | --- |
| 1. Recall (MMSE) | 769 | 0.76 (0.29) | - |  |  |  |  |  |  |  |  |  |  |  |  |  |  |  |  |  |  |  |  |  |  |  |  |  |  |  |  |
| 2. Writing (MMSE) | 767 | 0.98 (0.12) | 0.06 | - |  |  |  |  |  |  |  |  |  |  |  |  |  |  |  |  |  |  |  |  |  |  |  |  |  |  |  |
| 3. Language (MMSE) | 770 | 0.93 (0.09) | 0.15*** | 0.07* | - |  |  |  |  |  |  |  |  |  |  |  |  |  |  |  |  |  |  |  |  |  |  |  |  |  |  |
| 4. Attention (MMSE) | 770 | 0.97 (0.11) | 0.14*** | 0.09* | 0.11** | - |  |  |  |  |  |  |  |  |  |  |  |  |  |  |  |  |  |  |  |  |  |  |  |  |  |
| 5. Pentagons (MMSE) | 767 | 0.94 (0.24) | 0.02 | 0.14** | 0.03 | 0.02 | - |  |  |  |  |  |  |  |  |  |  |  |  |  |  |  |  |  |  |  |  |  |  |  |  |
| 6. Orientation (MMSE) | 770 | 0.93 (0.08) | 0.19*** | 0.08* | 0.12*** | 0.15*** | 0.07 | - |  |  |  |  |  |  |  |  |  |  |  |  |  |  |  |  |  |  |  |  |  |  |  |
| 7. Registration (MMSE) | 769 | 0.99 (0.10) | 0.09* | 0.16** | 0.14*** | 0.29*** | 0.08* | 0.10** | - |  |  |  |  |  |  |  |  |  |  |  |  |  |  |  |  |  |  |  |  |  |  |
| 8. Semantic Fluency | 770 | 22.23 (6.13) | 0.23*** | 0.08* | 0.18*** | 0.17*** | 0.05 | 0.19*** | 0.10** | - |  |  |  |  |  |  |  |  |  |  |  |  |  |  |  |  |  |  |  |  |  |
| 9. Boston Naming Task | 770 | 14.53 (0.84) | 0.15*** | 0.10** | 0.15*** | 0.10* | 0.08* | 0.19*** | 0.14*** | 0.29*** | - |  |  |  |  |  |  |  |  |  |  |  |  |  |  |  |  |  |  |  |  |
| 10. Word-List Memory Trial 1 | 770 | 5.09 (1.64) | 0.29*** | 0.05 | 0.14*** | 0.06 | 0.05 | 0.17*** | 0.07 | 0.29*** | 0.14*** | - |  |  |  |  |  |  |  |  |  |  |  |  |  |  |  |  |  |  |  |
| 11. Word-List Memory Trial 2 | 770 | 7.48 (1.68) | 0.33*** | 0.09* | 0.22*** | 0.11** | 0.03 | 0.17*** | 0.06 | 0.34*** | 0.19*** | 0.59*** | - |  |  |  |  |  |  |  |  |  |  |  |  |  |  |  |  |  |  |
| 12. Word-List Memory Trial 3 | 770 | 8.34 (1.49) | 0.32*** | 0.10** | 0.19*** | 0.15*** | 0.04 | 0.21*** | 0.10** | 0.33*** | 0.20*** | 0.49*** | 0.62*** | - |  |  |  |  |  |  |  |  |  |  |  |  |  |  |  |  |  |
| 13. Word-List Intrusions Trial 1 | 770 | 0.89 (1.13) | 0.05 | 0.07 | 0.04 | 0.04 | 0.01 | 0.04 | 0.05 | 0.05 | 0.05 | 0.17*** | 0.11** | 0.08 | - |  |  |  |  |  |  |  |  |  |  |  |  |  |  |  |  |
| 14. Word-List Intrusions Trial 2 | 770 | 0.44 (0.80) | 0.07 | 0.11** | 0.07 | 0.04 | 0.02 | 0.09* | 0.03 | 0.11** | 0.14*** | 0.18*** | 0.27*** | 0.19*** | 0.37*** | - |  |  |  |  |  |  |  |  |  |  |  |  |  |  |  |
| 15. Word-List Intrusions Trial 3 | 770 | 0.25 (0.60) | 0.12** | 0.03 | 0.12** | 0.04 | 0.04 | 0.11** | 0.04 | 0.13*** | 0.12** | 0.21*** | 0.25*** | 0.27*** | 0.28*** | 0.43*** | - |  |  |  |  |  |  |  |  |  |  |  |  |  |  |
| 16. Constructional Praxis Circle | 766 | 1.88 (0.33) | 0.04 | 0.02 | 0.03 | 0.12** | 0.02 | 0.05 | 0.07 | 0.05 | 0.06 | 0.04 | 0.03 | 0.04 | 0.04 | 0.06 | 0.03 | - |  |  |  |  |  |  |  |  |  |  |  |  |  |
| 17. Constructional Praxis Diamond | 766 | 2.61 (0.53) | 0.08* | 0.06 | 0.08* | 0.08* | 0.10** | 0.07* | 0.04 | 0.05 | 0.07 | 0.04 | 0.07 | 0.07 | 0.06 | 0.06 | 0.05 | 0.10** | - |  |  |  |  |  |  |  |  |  |  |  |  |
| 18. Constructional Praxis Cube | 766 | 3.32 (0.78) | 0.11** | 0.10** | 0.10** | 0.07 | 0.14*** | 0.10** | 0.08 | 0.15*** | 0.14*** | 0.08* | 0.14*** | 0.11** | 0.04 | 0.10** | 0.08* | 0.10** | 0.14*** | - |  |  |  |  |  |  |  |  |  |  |  |
| 19. Word-List Recall (Delay) | 770 | 7.16 (2.25) | 0.33*** | 0.10** | 0.18*** | 0.16*** | 0.03 | 0.27*** | 0.07 | 0.36*** | 0.19*** | 0.49*** | 0.65*** | 0.71*** | 0.08* | 0.22*** | 0.32*** | 0.04 | 0.06 | 0.12** | - |  |  |  |  |  |  |  |  |  |  |
| 20. Word-List Recall (Delay) Intrusions | 770 | 0.62 (0.99) | 0.14*** | 0.06 | 0.12*** | 0.06 | 0.02 | 0.13*** | 0.04 | 0.10* | 0.09* | 0.27*** | 0.33*** | 0.30*** | 0.29*** | 0.45*** | 0.51*** | 0.08* | 0.03 | 0.07 | 0.43*** | - |  |  |  |  |  |  |  |  |  |
| 21. Word-List Recognition Yes | 770 | 9.79 (0.62) | 0.22*** | 0.04 | 0.11** | 0.10* | 0.03 | 0.10** | 0.09* | 0.16*** | 0.09* | 0.20*** | 0.34*** | 0.31*** | 0.09* | 0.12*** | 0.15*** | 0.02 | 0.04 | 0.08 | 0.40*** | 0.19*** | - |  |  |  |  |  |  |  |  |
| 22. Word-List Recognition No | 770 | 9.89 (0.54) | 0.16*** | 0.12** | 0.12** | 0.06 | 0.02 | 0.17*** | 0.04 | 0.17*** | 0.13*** | 0.23*** | 0.28*** | 0.31*** | 0.05 | 0.18*** | 0.23*** | 0.05 | 0.05 | 0.12*** | 0.37*** | 0.25*** | 0.20*** | - |  |  |  |  |  |  |  |
| 23. Constructional Praxis Recall Circle | 767 | 1.78 (0.52) | 0.10** | 0.14*** | 0.06 | 0.07 | 0.08* | 0.07 | 0.10* | 0.11** | 0.13*** | 0.11** | 0.15*** | 0.17*** | 0.09* | 0.08* | 0.09* | 0.22*** | 0.12*** | 0.15*** | 0.18*** | 0.13*** | 0.08* | 0.10** | - |  |  |  |  |  |  |
| 24. Constructional Praxis Recall Diamond | 767 | 2.06 (1.09) | 0.14*** | 0.04 | 0.07 | 0.08* | 0.02 | 0.13*** | 0.05 | 0.13*** | 0.11** | 0.08 | 0.13*** | 0.16*** | 0.11** | 0.11** | 0.11** | 0.01 | 0.11** | 0.06 | 0.16*** | 0.09* | 0.08* | 0.08 | 0.16*** | - |  |  |  |  |  |
| 25. Constructional Praxis Recall Rectangles | 767 | 1.82 (0.56) | 0.06 | 0 | 0.04 | 0.06 | 0.01 | 0.12** | 0.04 | 0.15*** | 0.16*** | 0.11** | 0.15*** | 0.16*** | 0.02 | 0.10** | 0.16*** | 0.02 | 0.01 | 0.14*** | 0.15*** | 0.12** | 0.14*** | 0.17*** | 0.11** | 0.11** | - |  |  |  |  |
| 26. Constructional Praxis Recall Cube | 767 | 2.84 (1.08) | 0.11** | 0.09* | 0.11** | 0.04 | 0.17*** | 0.09* | 0.05 | 0.14*** | 0.17*** | 0.12** | 0.18*** | 0.17*** | 0.07 | 0.11** | 0.10* | 0.09* | 0.08* | 0.44*** | 0.19*** | 0.10** | 0.12*** | 0.14*** | 0.18*** | 0.07 | 0.11** | - |  |  |  |
| 27. Constructional Praxis Recall Pentagons | 767 | 1.39 (1.32) | 0.15*** | 0.07 | 0.10** | 0.05 | 0.07 | 0.13*** | 0.03 | 0.16*** | 0.17*** | 0.14*** | 0.21*** | 0.24*** | 0.03 | 0.10** | 0.11** | 0.02 | 0.10** | 0.19*** | 0.21*** | 0.12*** | 0.10** | 0.10** | 0.07 | 0.06 | 0.09* | 0.13*** | - |  |  |
| 28. TMT part A (in s) | 770 | 41.98 (16.92) | 0.20*** | 0.05 | 0.17*** | 0.09* | 0.09* | 0.15*** | 0.10* | 0.32*** | 0.25*** | 0.19*** | 0.24*** | 0.25*** | 0.05 | 0.07 | 0.11** | 0.05 | 0.10** | 0.16*** | 0.23*** | 0.10* | 0.12** | 0.11** | 0.10** | 0.13*** | 0.14*** | 0.16*** | 0.13*** | - |  |
| 29. TMT part B (in s) | 767 | 99.40 (50.86) | 0.24*** | 0.11** | 0.21*** | 0.17*** | 0.10** | 0.22*** | 0.15*** | 0.38*** | 0.34*** | 0.26*** | 0.32*** | 0.31*** | 0.07 | 0.11** | 0.13*** | 0.05 | 0.15*** | 0.26*** | 0.30*** | 0.12*** | 0.14*** | 0.18*** | 0.19*** | 0.15*** | 0.20*** | 0.25*** | 0.23*** | 0.57*** | - |
| 30. Verbal fluency test Phonemic fluency | 769 | 14.24 (4.59) | 0.21*** | 0.03 | 0.19*** | 0.14*** | 0.06 | 0.12** | 0.06 | 0.44*** | 0.22*** | 0.25*** | 0.30*** | 0.29*** | 0.05 | 0.08 | 0.08 | 0.03 | 0.08* | 0.10** | 0.30*** | 0.08 | 0.14*** | 0.09* | 0.10** | 0.09* | 0.10* | 0.11** | 0.12** | 0.27*** | 0.33*** |
| Note. 1.-7. are subdomains of the Mini Mental State Examination based on Rubright et al.. 2016 | | | | | | | | | | | | | | | | | | | | | | | | | | | | | | | |

Table 11. Item-level description of data-driven domains

| **Attention** | Attention (MMSE)  Registration (MMSE) |
| --- | --- |
| **Memory** | Constructional Praxis Recall overlapping Diamond (CERAD-plus NAB)  Orientation (MMSE)  Recall (MMSE)  Word-List Recall (Delay) (CERAD-plus NAB)  Word-List Recognition Yes (CERAD-plus NAB)  Word-List Recognition No (CERAD-plus NAB)  Word-List Memory Trial 1 (CERAD-plus NAB)  Word List Memory Trial 2 (CERAD-plus NAB)  Word List Memory Trial 3 (CERAD-plus NAB) |
| **Intrusion** | Word-List Intrusions Trial 1 (CERAD-plus NAB)  Word-List Intrusions Trial 2 (CERAD-plus NAB)  Word-List Intrusions Trial 3 (CERAD-plus NAB) |
| **Visuospatial** | Constructional Praxis Recall cube (CERAD-plus NAB)  Constructional praxis circle (CERAD-plus NAB)  Constructional praxis cube (CERAD-plus NAB)  Pentagons (MMSE) |
| **Executive/Language** | Boston naming test modified (CERAD-plus NAB)  Language (MMSE)  Verbal fluency test Phonemic fluency (CERAD-plus NAB)  Verbal Fluency Test Semantic fluency (CERAD-plus NAB)  TMT part A (in s) (CERAD-plus NAB)  TMT part B (in s) (CERAD-plus NAB) |

*Note.* MMSE: Subdomains of the Mini Mental State Examination based on Rubright et al., 2016

Table 12. Item-level description of conventional theory-driven domains

| **Global cognition** | MMSE z-score |
| --- | --- |
| **Executive** | TMT part B z-score (CERAD-plus NAB) |
| **Memory** | Word-List Recall (Delay) z-score (CERAD-plus NAB)  Constructional Praxis Recall z-score (CERAD-plus NAB) |
| **Language** | Verbal Fluency Test Semantic fluency z-score (CERAD-plus NAB)  Verbal fluency test Phonemic fluency z-score (CERAD-plus NAB)  Boston naming test modified z-score (CERAD-plus NAB) |
| **Visuospatial** | Constructional Praxis z-score (CERAD-plus NAB) |
